# Supplementary material
Source: ML conference proceedings conference paper supplement (https://openreview.net/forum?id=f_GA2IU9-K-)
Supplement: supplementary_material [file attachment]

# SUPPLEMENTARY MATERIAL OF "NON-DECREASING QUANTILE FUNCTION WITH EFFICIENT EXPLORATION FOR DISTRIBUTIONAL REINFORCEMENT LEARNING"

**Anonymous authors**

Paper under double-blind review

## A HYPER-PARAMETERS SETTINGS FOR NDQFN WITH DPE

We consider multiple set of hyper-parameters, and the following one has the best performance in practice.

| Parameter                            | Value       |
|--------------------------------------|-------------|
| Min history to start learning        | 200K frames |
| Online network optimizer             | Adam        |
| Online Learning rate                 | 0.0000625   |
| Batch size                           | 32          |
| Number of $p^*$                      | 32          |
| Number of sampled $\tau$ and $\tau'$ | 32          |
| Discount factor                      | 0.99        |
| Step for n-step updates              | 3           |
| Target network update frequency      | 40K frames  |
| Predictor network learning rate      | 0.0000625   |
| Predictor network optimizer          | Adam        |

Table 1: Hyper-parameter Settings for NDQFN with DPE

## B MAIN ALGORITHM OF NDQFN+DPE

---

### Algorithm 1 NDQFN with DPE

---

```

Initialize replay memory  $D$ 
Initialize online network  $Q_\omega$ , target network  $Q_{\omega'}$  and predictor network  $Q_{\omega^*}$  randomly
For  $episode = 1, M$  do
  Initialize state  $x_1$ 
  For  $t = 1, T$  do
    Compute non-decreasing continuous quantile function by NDQFN
    Compute distributional prediction error  $i(x_t, a_t)$ 
    Select  $a_t = \arg \max_a [Q_{\omega'}(x_t, a) + c_t i(x_t, a)]$ 
    Execute action  $a_t$  in emulator and observe reward  $r_t$  and state  $x_{t+1}$ 
    if  $t > n$ , then
      store transition  $(x_{t-n}, a_{t-n}, r_{t-n+1}, \dots, r_t, x_t)$  in  $D$ 
    else
      store transition  $(x_1, a_1, r_1, \dots, r_t, x_t)$  in  $D$ 
    end if
    Sample random minibatch of transitions  $(x_j, a_j, r_j, \dots, r_{j+n-1}, x_{j+n})$  from  $D$ 
    Perform a gradient descent step on  $L(x_j, a_j, r_j, \dots, r_{j+n-1}, x_{j+n})$  with respect to the net-
    work parameters  $\omega$  and  $\omega^*$ 
    Every C steps reset  $\omega' = \omega$ 
  end for
end for

```

---

## C COMPARISON OF DIFFERENT $g$ INPUTS IN NDQFN

To investigate the empirical performance of the two different  $g$  function inputs mentioned in Section , we do some experiments on three Atari 2600 games (Breakout, Venture, Montezuma Revenge) for 100 million frames. The results are summarized in Figure 1.

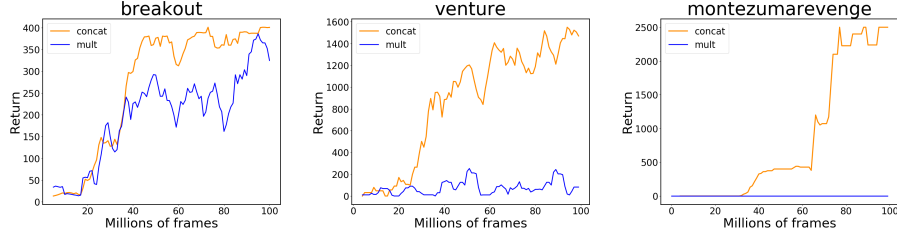

Figure 1: Performance comparison with different forms to combine  $\psi(x)$ ,  $\phi(p_i)$  and  $\phi(p_{i-1})$ , where "concat" denotes  $g$  takes  $(\psi(x) \odot \phi(p_i)$  and  $\phi(p_i) - \phi(p_{i-1})$  as input and "mult" denotes  $g$  takes  $\psi(x) \odot \phi(p_{i-1}) \odot \phi(p_i)$  as input.

## D DISTRIBUTION-BASED VS VALUE-BASED

To compare the empirical performance of distribution-based and value-based prediction error, three hard explored games are evaluated for 100 million frames. The exploration bonus of value-based prediction error is defined as follow:

$$i'(x_t, a_t) = |Q_{\omega'}(x_t, a_t) - Q_{\omega^*}(x_t, a_t)|,$$

where  $Q_{\omega'}(\cdot)$  and  $Q_{\omega^*}(\cdot)$  denote the state-action value function of the target and predictor network, respectively. Figure 2 illustrates that distribution-based prediction error outperforms value-based prediction error significantly on three hard-explored games under 100M training.

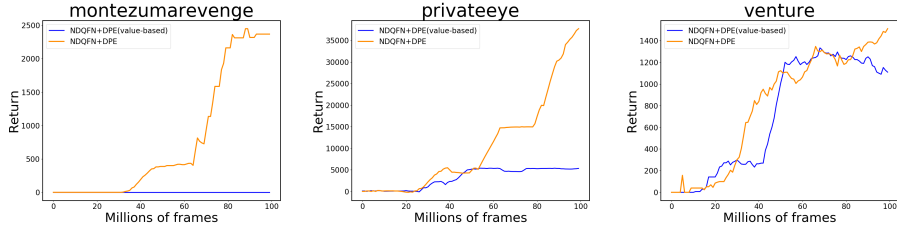

Figure 2: Comparison between distribution-based and value-based prediction error.

## E ADDITIONAL RESULTS ABOUT NDQFN VS IQN

As a supplement of Section 6.1, Figure 3 visualizes the training curves of other Atari 2600 games for 100 million frames. The setting of experiments is aligned with Section 6.1. NDQFN significantly outperforms IQN with n-steps updates in most cases, especially in the early training stage with limited training samples.

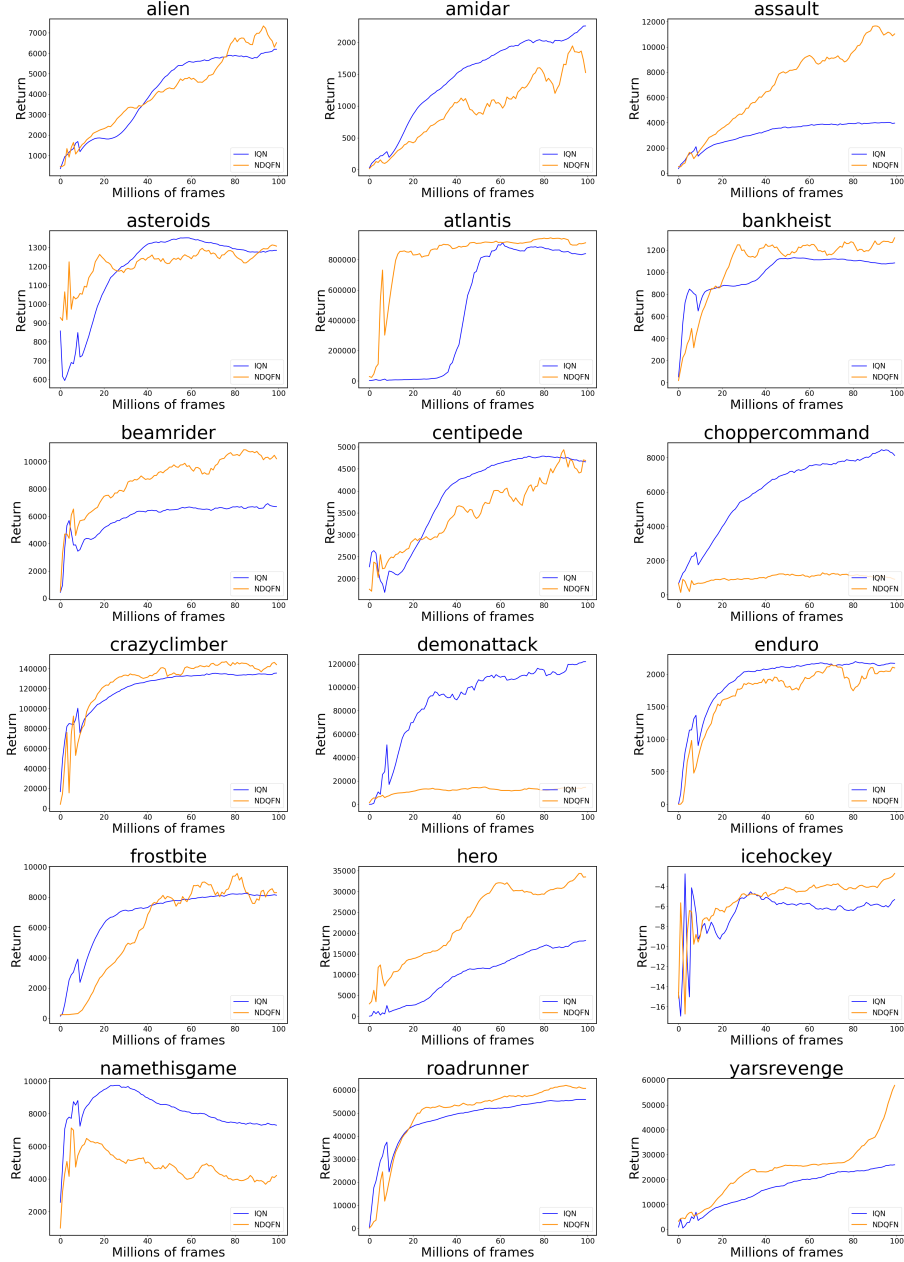

Figure 3: Training curve on Atari games for NDQFN and IQN.

## F TRAINING CURVE

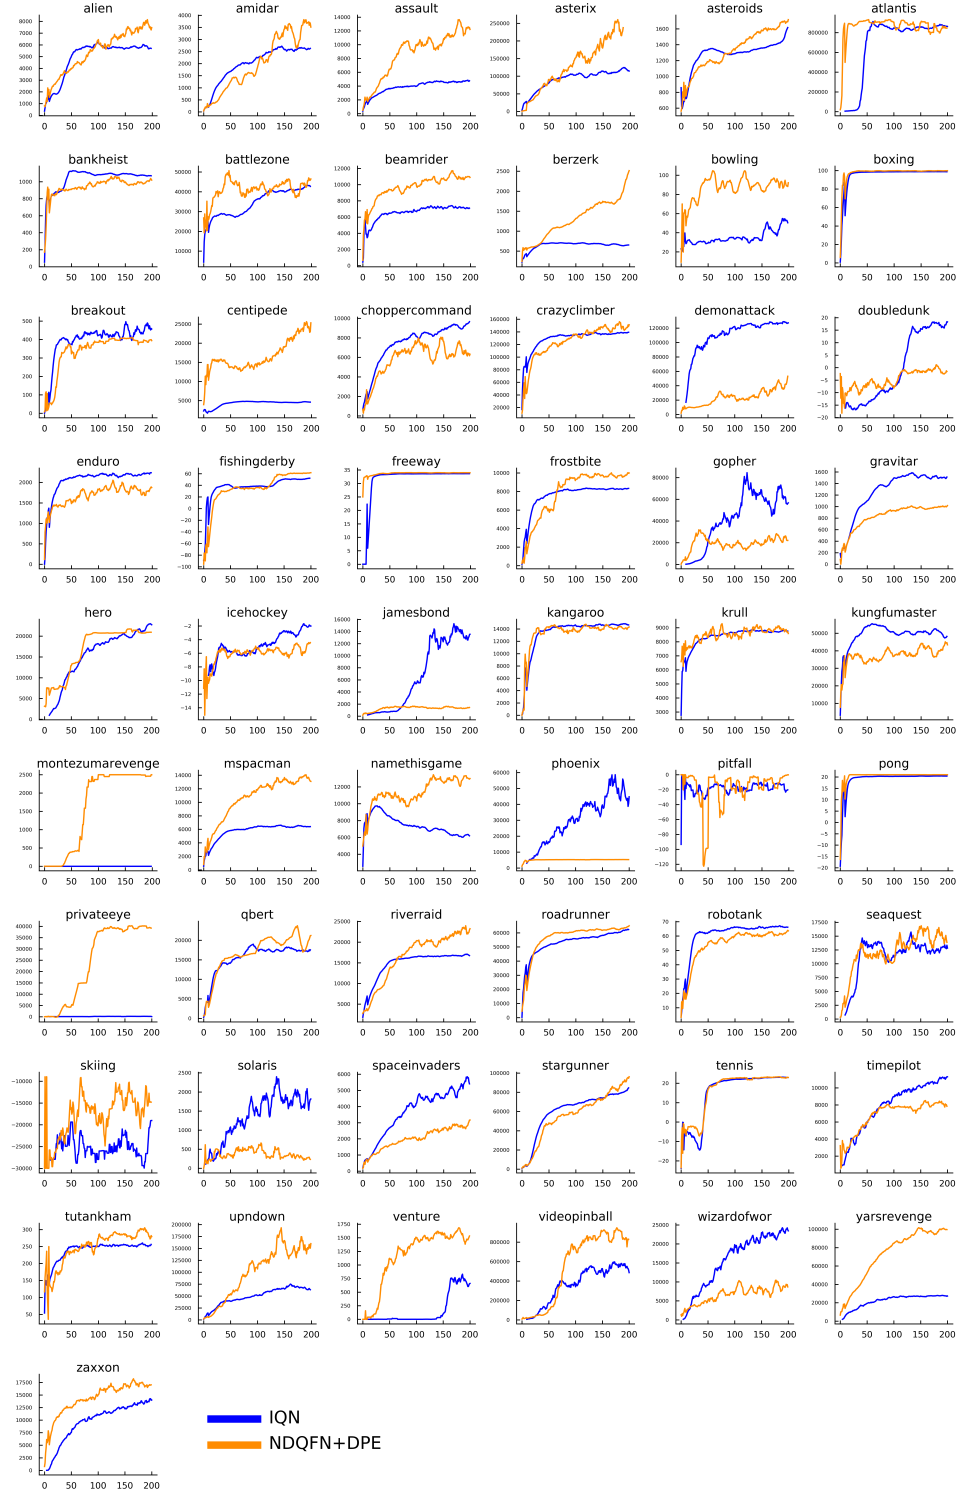

Figure 4: Complete Atari-55 training curves.

## G RAW SCORE

| GAMES            | RANDOM   | HUMAN   | DQN      | PRIOR.DUEL. | QRDQN           | IQN            | FQF             | NDQFN+DPE        |
|------------------|----------|---------|----------|-------------|-----------------|----------------|-----------------|------------------|
| Alien            | 227.8    | 7127.7  | 1620.0   | 3941.0      | 4871.0          | 7022.0         | <b>16754.6</b>  | 9398.9           |
| Amidar           | 5.8      | 1719.5  | 978.0    | 2296.8      | 1641.0          | 2946.0         | 3165.3          | <b>4503.0</b>    |
| Assault          | 222.4    | 742.0   | 4280.4   | 11477.0     | 22012.0         | <b>29091.0</b> | 23020.1         | 14314.2          |
| Asterix          | 210.0    | 8503.3  | 4359.0   | 375080.0    | 261025.0        | 342016.0       | <b>578388.5</b> | 308462.2         |
| Asteroids        | 719.1    | 47388.7 | 1364.5   | 1192.7      | 4226.0          | 2898.0         | <b>4553.0</b>   | 1848.7           |
| Atlantis         | 12850.0  | 29028.1 | 279987.0 | 395762.0    | 971850.0        | 978200.0       | 957920.0        | <b>1022680.0</b> |
| BankHeist        | 14.2     | 753.1   | 455.0    | 1503.1      | 1249.0          | <b>1416.0</b>  | 1259.1          | 1203.7           |
| BattleZone       | 2360.0   | 37187.5 | 29900.0  | 35520.0     | 39268.0         | 42244.0        | <b>87928.6</b>  | 74326.1          |
| BeamRider        | 363.9    | 16926.5 | 8627.5   | 30276.5     | 34821.0         | <b>42776.0</b> | 37106.6         | 11297.2          |
| Berzerk          | 123.7    | 2630.4  | 585.6    | 3409.0      | 3117.0          | 1053.0         | <b>12422.2</b>  | 2758.2           |
| Bowling          | 23.1     | 160.7   | 50.4     | 46.7        | 77.2            | 86.5           | 102.3           | <b>126.6</b>     |
| Boxing           | 0.1      | 12.1    | 88.0     | 98.9        | 99.9            | 99.8           | 98.0            | <b>100.0</b>     |
| Breakout         | 1.7      | 30.5    | 385.5    | 366.0       | 742.0           | 734.0          | <b>854.2</b>    | 416.1            |
| Centipede        | 2090.9   | 12017.0 | 4657.7   | 7687.5      | 12447.0         | 11561.0        | 11526.0         | <b>43555.0</b>   |
| ChopperCommand   | 811.0    | 7387.8  | 6126.0   | 13185.0     | 14667.0         | 16836.0        | <b>876460.0</b> | 12066.7          |
| CrazyClimber     | 10780.5  | 35829.4 | 110763.0 | 162224.0    | 161196.0        | 179082.0       | <b>223470.6</b> | 196887.5         |
| DemonAttack      | 152.1    | 1971.0  | 12149.4  | 72878.6     | 121551.0        | 128580.0       | <b>131697.0</b> | 72048.3          |
| DoubleDunk       | -18.6    | -16.4   | -6.6     | -12.5       | 21.9            | 5.6            | <b>22.9</b>     | 0.8              |
| Enduro           | 0.0      | 860.5   | 729.0    | 2306.4      | 2355.0          | 2359.0         | 2370.8          | <b>2374.1</b>    |
| FishingDerby     | -91.7    | -38.7   | -4.9     | 41.3        | 39.0            | 33.8           | 52.7            | <b>63.0</b>      |
| Freeway          | 0.0      | 29.6    | 30.8     | 33.0        | <b>34.0</b>     | <b>34.0</b>    | 33.7            | <b>34.0</b>      |
| Frostbite        | 65.2     | 4334.7  | 797.4    | 7413.0      | 4384.0          | 4324.0         | <b>16472.9</b>  | 10684.4          |
| Gopher           | 257.6    | 2412.5  | 8777.4   | 104368.2    | 113585.0        | 118365.0       | <b>121144.0</b> | 51865.5          |
| Gravitar         | 173.0    | 3351.4  | 473.0    | 238.0       | 995.0           | 911.0          | <b>1406.0</b>   | 1098.1           |
| Hero             | 1027.0   | 30826.4 | 20437.8  | 21036.5     | 21395.0         | 28386.0        | <b>30926.2</b>  | 26074.3          |
| IceHockey        | -11.2    | 0.9     | -1.9     | -0.4        | -1.7            | 0.2            | <b>17.3</b>     | -2.8             |
| Jamesbond        | 29.0     | 302.8   | 768.5    | 812.0       | 4703.0          | 35108.0        | 87291.7         | <b>2524</b>      |
| Kangaroo         | 52.0     | 3035.0  | 7259.0   | 1792.0      | 15356.0         | 15487.0        | 15400.0         | <b>15836.4</b>   |
| Krull            | 1598.0   | 2665.5  | 8422.3   | 10374.0     | 11447.0         | 10707.0        | 10706.8         | <b>10894.3</b>   |
| KungFuMaster     | 258.5    | 22736.3 | 26059.0  | 48375.0     | 76642.0         | 73512.0        | 111138.5        | 53702.9          |
| MontezumaRevenge | 0.0      | 4753.3  | 0.0      | 0.0         | 0.0             | 0.0            | 0.0             | <b>2500.0</b>    |
| MsPacman         | 307.3    | 6951.6  | 3085.6   | 3327.3      | 5821.0          | 6349.0         | 7631.9          | <b>16027.5</b>   |
| NameThisGame     | 2292.3   | 8049.0  | 8207.8   | 15572.5     | 21890.0         | <b>22682.0</b> | 16989.4         | 15927.4          |
| Phoenix          | 761.4    | 7242.6  | 8485.2   | 70324.3     | 16585.0         | 56599.0        | <b>174077.5</b> | 5500.0           |
| Pitfall          | -229.4   | 6463.7  | -286.1   | 0.0         | 0.0             | 0.0            | 0.0             | <b>0.5</b>       |
| Pong             | -20.7    | 14.6    | 19.5     | 20.9        | <b>21.0</b>     | <b>21.0</b>    | <b>21.0</b>     | <b>21.0</b>      |
| PrivateEye       | 24.9     | 69571.3 | 146.7    | 206.0       | 350.0           | 200.0          | 140.1           | <b>40500.0</b>   |
| Qbert            | 163.9    | 13455.0 | 13117.3  | 18760.3     | <b>572510.0</b> | 25750.0        | 27524.4         | 24825.1          |
| Riverraid        | 1338.5   | 17118.0 | 7377.6   | 20607.6     | 17571.0         | 17765.0        | 23560.7         | <b>26982.1</b>   |
| RoadRunner       | 11.5     | 7845.0  | 39544.0  | 62151.0     | 64262.0         | 57900.0        | 58072.7         | <b>66475.5</b>   |
| Robotank         | 2.2      | 11.9    | 63.9     | 27.5        | 59.4            | 62.5           | <b>75.7</b>     | 67.8             |
| Seaquest         | 68.4     | 42054.7 | 5860.6   | 931.6       | 8268.0          | 30140.0        | 29383.3         | <b>30156.1</b>   |
| Skiing           | -17098.1 | -4336.9 | -13062.3 | -19949.9    | -9324.0         | -9289.0        | -9085.3         | <b>-6450.0</b>   |
| Solaris          | 1236.3   | 12326.7 | 3482.8   | 133.4       | 6740.0          | <b>8007.0</b>  | 6906.7          | 1843.3           |
| SpaceInvaders    | 148.0    | 1668.7  | 1692.3   | 15311.5     | 20972.0         | 28888.0        | <b>46498.3</b>  | 3494.0           |
| StarGunner       | 664.0    | 10250.0 | 54282.0  | 125117.0    | 77495.0         | 74677.0        | <b>131981.2</b> | 85136.0          |
| Tennis           | -23.8    | -9.3    | 12.2     | 0.0         | <b>23.6</b>     | <b>23.6</b>    | 22.6            | <b>23.6</b>      |
| TimePilot        | 3568.0   | 5229.2  | 4870.0   | 7553.0      | 10345.0         | 12236.0        | <b>14995.2</b>  | 9984.1           |
| Tutankham        | 11.4     | 167.6   | 68.1     | 245.9       | 297.0           | 293.0          | 309.2           | <b>332.2</b>     |
| UpNDown          | 533.4    | 11693.2 | 9989.9   | 33879.1     | 71260.0         | 88148.0        | 75474.4         | <b>333790.1</b>  |
| Venture          | 0.0      | 1187.5  | 163.0    | 48.0        | 43.9            | 1318.0         | 1112            | <b>1827.3</b>    |
| VideoPinball     | 16256.9  | 17667.9 | 196760.4 | 479197.0    | 705662.0        | 698045.0       | 799155.6        | <b>941443.2</b>  |
| WizardOfWor      | 563.5    | 4756.5  | 2704.0   | 12352.0     | 25061.0         | 31190.0        | <b>44782.6</b>  | 17744.1          |
| YarsRevenge      | 3092.9   | 54576.9 | 18098.9  | 69618.1     | 26447.0         | 28379.0        | 27691.2         | <b>105450.2</b>  |
| Zaxxon           | 32.5     | 9173.3  | 5363.0   | 13886.0     | 13113.0         | <b>21772.0</b> | 15179.5         | 21144.3          |

Table 2: Raw scores across all games, averaged over 0.125M frames, from the agent snapshot that obtained the highest score during training.
